# Supplementary material
Source: PubMed Central journal article supplement (PMC3696824)
Supplement: 1309354110_pnas.201309354SI.pdf [file 1309354110_pnas.201309354SI.pdf]

# Supporting Information

Wen et al. 10.1073/pnas.1309354110

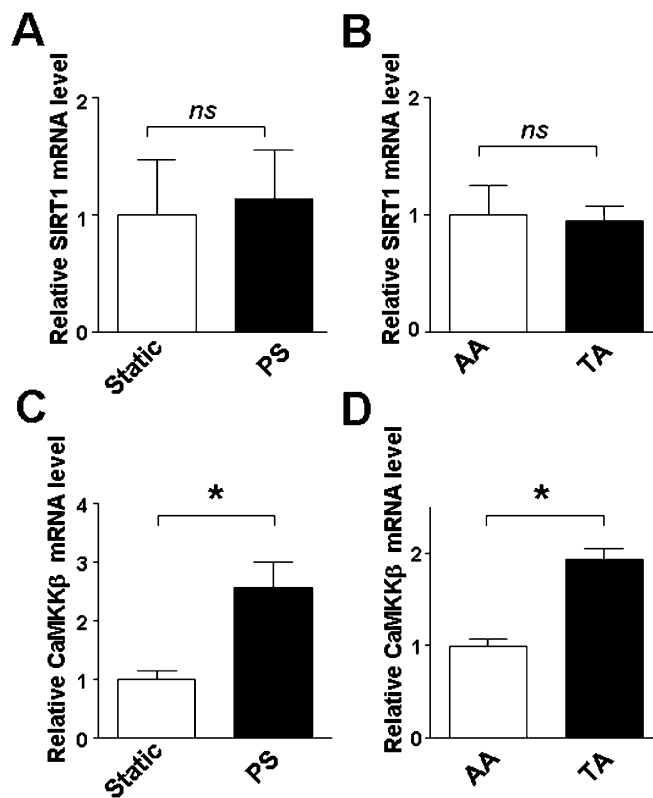

**Fig. S1.** Pulsatile shear stress (PS) increases  $\text{Ca}^{2+}$ /calmodulin-dependent protein kinase kinase (CaMKK) $\beta$  mRNA but has little effect on Sirtuin (SIRT)1 mRNA in vitro and in vivo. The levels of SIRT1 mRNA (A and B) and CaMKK $\beta$  mRNA (C and D) in the human umbilical vein endothelial cells (HUVECs) exposed to static or PS (A and C) and in the thoracic aorta (TA) and aortic arch (AA) regions of the wild-type mice (B and D). The results are the means  $\pm$  SEM of at least three independent experiments in A and seven animals in B. \* $P < 0.05$ ; ns, no statistical difference.

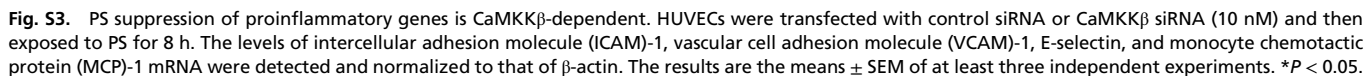

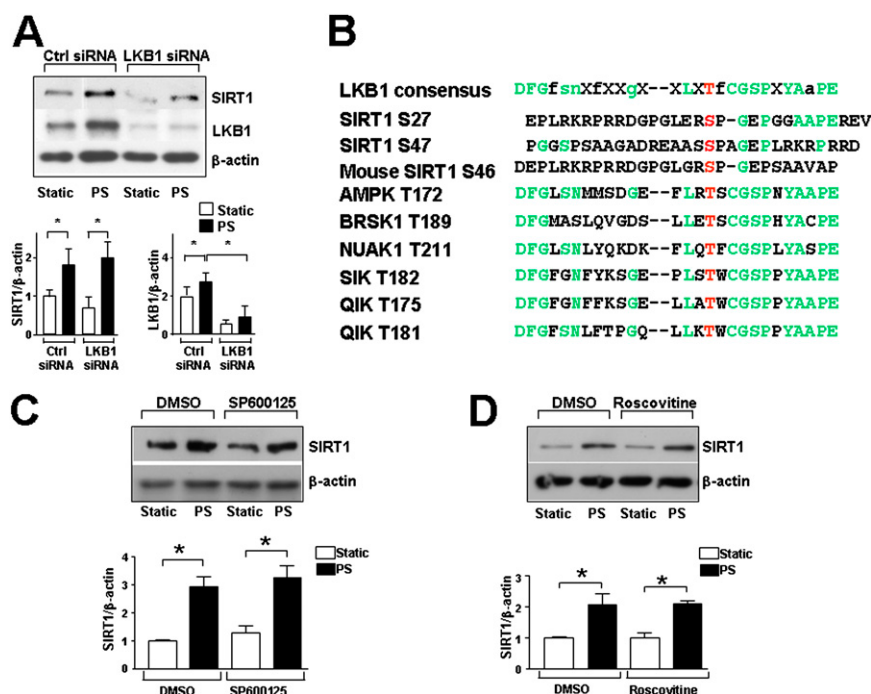

**Fig. S4.** Liver kinase (LK)B1, JNKs, and cyclin-dependent kinase (CDK)5 are not involved in SIRT1 regulation by PS. (A) SIRT1 and LKB1 levels in HUVECs transfected with control siRNA or LKB1 siRNA (10 nM) and then exposed to PS for 8 h or kept under static conditions. Bar graphs to the right summarize the mean  $\pm$  SEM results of three independent experiments. \* $P$  < 0.05. (B) Alignment of LKB1 substrate consensus sequences with peptide sequences flanking human SIRT1 Ser-27, human SIRT1 Ser-47, mouse SIRT1 Ser-46, AMP-activated protein kinase (AMPK) Thr-172, brain specific serine/threonine kinase (BRSK)1 Thr-189, NUA1 Thr-211, SIK Thr-182, Qin-induced kinase (QIK) Thr-175, and QIK Thr-181. Capitalization indicates the highly conservative residues. (C and D) HUVECs were pretreated with 10  $\mu$ M SP600125 (C), 10  $\mu$ M Roscovitine (D), or DMSO for 30 min and then subjected to PS for 8 h. SIRT1 level in HUVECs were determined by immunoblotting. The bar graphs below summarize the means  $\pm$  SEM from at least three independent experiments.

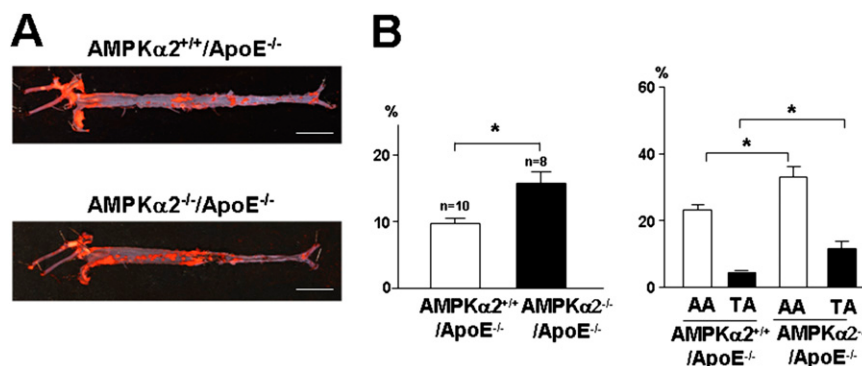

**Fig. S5.** AMPK $\alpha$ 2 ablation increases atherosclerosis in apolipoprotein (Apo)E $^{-/-}$  mice. (A) Macro photographs of oil red O-stained aorta from AMPK $\alpha$ 2 $^{+/+}$  ApoE $^{-/-}$  and AMPK $\alpha$ 2 $^{-/-}$  ApoE $^{-/-}$  mice fed a Paigen diet for 12 wk. (Scale bar: 0.5 cm.) (B) Quantification of the results shown as the mean  $\pm$  SEM of the aortic specimens with the indicated number of animals. Quantification of percentage of lesion areas in the whole aorta (Left) and AA and TA (Right). \* $P < 0.05$ .

**Table S1. Values of SIRT1 pSer27 main sequence ions**

| pSer27 main sequence ions | <i>m/z</i> |
|---------------------------|------------|
| b ion                     |            |
| b1                        | N/A        |
| b2                        | 201.1      |
| b3                        | 272.1      |
| b4                        | 359.2      |
| b5                        | 446.2      |
| b6                        | 543.2      |
| b7                        | 614.3      |
| b8                        | 671.3      |
| b9                        | 800.3      |
| b10                       | 897.4      |
| b11                       | 1,010.5    |
| y ion                     |            |
| y1                        | 175.1      |
| y2                        | 288.2      |
| y3                        | 385.3      |
| y4                        | 514.3      |
| y5                        | 571.3      |
| y6                        | 642.4      |
| y7                        | 739.4      |
| y8                        | 826.4      |
| y9                        | 913.5      |
| y10                       | 984.5      |
| y11                       | 1,055.5    |

Low-energy collision-induced dissociation was used for fragmentation to generate b and y ions. *m/z*, mass-to-charge ratio; N/A, not available.

**Table S2. Values of SIRT1 pSer47 main sequence ions**

| pSer27 main sequence ions | <i>m/z</i> |
|---------------------------|------------|
| b ion                     |            |
| b1                        | N/A        |
| b2                        | 185.1      |
| b3                        | 242.1      |
| b4                        | 371.2      |
| b5                        | 468.2      |
| b6                        | 525.2      |
| b7                        | 582.3      |
| b8                        | 653.3      |
| b9                        | 724.3      |
| b10                       | 821.4      |
| b11                       | 950.4      |
| y ion                     |            |
| y1                        | 175.1      |
| y2                        | 304.2      |
| y3                        | 401.2      |
| y4                        | 472.3      |
| y5                        | 543.3      |
| y6                        | 600.3      |
| y7                        | 657.3      |
| y8                        | 754.4      |
| y9                        | 883.4      |
| y10                       | 940.4      |
| y11                       | 1,037.5    |

Low-energy collision-induced dissociation was used for fragmentation to generate b and y ions. *m/z*, mass-to-charge ratio; N/A, not available.

**Table S3. Serum lipid profile of CaMKK $\beta^{-/-}$ /ApoE $^{-/-}$  and their CaMKK $\beta^{+/+}$ /ApoE $^{-/-}$  littermates**

| Serum lipids       | CaMKK $\beta^{+/+}$ ApoE $^{-/-}$ , mg/dL (n = 6) | CaMKK $\beta^{-/-}$ ApoE $^{-/-}$ , mg/dL (n = 6) |
|--------------------|---------------------------------------------------|---------------------------------------------------|
| TC                 | 2,899 $\pm$ 188                                   | 2,875 $\pm$ 160                                   |
| TG*                | 269 $\pm$ 73                                      | 263 $\pm$ 7                                       |
| LDL-C              | 1,875 $\pm$ 179                                   | 1,881 $\pm$ 4179                                  |
| VLDL-C             | 53 $\pm$ 7                                        | 53 $\pm$ 5                                        |
| HDL-C <sup>†</sup> | 678 $\pm$ 96                                      | 624 $\pm$ 88                                      |

All values are expressed as means  $\pm$  SEM averaged from six animals in each group. HDL-C, HDL-cholesterol; LDL-C, LDL-cholesterol; TC, total cholesterol; TG, triglyceride; VLDL-C, very-low-density lipoprotein-cholesterol.

\*The TG value is divided by 5 to estimate VLDL-C levels.

<sup>†</sup>The HDL-C value was determined by the following formula: HDL-C = (TC – LDL-C – TG)/5.

**Table S4. Serum lipid profile of EC-SIRT1 $^{-/-}$ /ApoE $^{-/-}$  and their EC-SIRT1 $^{+/+}$ /ApoE $^{-/-}$  littermates**

| Serum lipids       | SIRT1 EC $^{-/-}$ ApoE $^{-/-}$ , mg/dL (n = 7) | SIRT1 EC $^{+/+}$ ApoE $^{-/-}$ , mg/dL (n = 7) |
|--------------------|-------------------------------------------------|-------------------------------------------------|
| TC                 | 2,466 $\pm$ 90                                  | 2,366 $\pm$ 100                                 |
| TG*                | 254 $\pm$ 35                                    | 247 $\pm$ 38                                    |
| LDL-C              | 1,826 $\pm$ 46                                  | 1,916 $\pm$ 153                                 |
| VLDL-C             | 50 $\pm$ 7                                      | 49 $\pm$ 7                                      |
| HDL-C <sup>†</sup> | 566 $\pm$ 91                                    | 556 $\pm$ 58                                    |

All values are expressed as means  $\pm$  SEM averaged from number of animals as indicated. EC, endothelial cell.

\*The triglyceride value is divided by 5 to estimate VLDL-C levels.

<sup>†</sup>The HDL-C value was determined by the following formula: HDL-C = (TC – LDL-C – TG)/5.
